# Supplementary material
Source: publisher figshare collection journal article supplement (https://tandf.figshare.com/ndownloader/files/21874482)
Supplement: Supplementary file 1 [file 21874482]

Table S1. Voucher information for *Prunus* spp. used in this study.

| Accessions | Voucher localities | Voucher data | Collector’s Name | Voucher number |
| --- | --- | --- | --- | --- |
| Wild accessions |  |  |  |  |
| *Prunus armeniaca* L*.* | China, Xinjiang Uygur Autonomous Region, Huocheng county | 9 April 2019 | Wenwen Li, Liqiang Liu, Yannan Wang | DZGhcmd01 |
| *Prunus armeniaca* L*.* | China, Xinjiang Uygur Autonomous Region, Huocheng county | 9 April 2019 | Wenwen Li, Liqiang Liu, Yannan Wang | DZGhcmd02 |
| *Prunus armeniaca* L*.* | China, Xinjiang Uygur Autonomous Region, Huocheng county | 9 April 2019 | Wenwen Li, Liqiang Liu, Yannan Wang | DZGhcmd03 |
| *Prunus armeniaca* L*.* | China, Xinjiang Uygur Autonomous Region, Huocheng county | 9 April 2019 | Wenwen Li, Liqiang Liu, Yannan Wang | DZGhcmd04 |
| *Prunus armeniaca* L*.* | China, Xinjiang Uygur Autonomous Region, Huocheng county | 9 April 2019 | Wenwen Li, Liqiang Liu, Yannan Wang | DZGhcmd05 |
| *Prunus armeniaca* L*.* | China, Xinjiang Uygur Autonomous Region, Huocheng county | 9 April 2019 | Wenwen Li, Liqiang Liu, Yannan Wang | DZGhcmd06 |
| *Prunus armeniaca* L*.* | China, Xinjiang Uygur Autonomous Region, Huocheng county | 9 April 2019 | Wenwen Li, Liqiang Liu, Yannan Wang | DZGhcmd07 |
| *Prunus armeniaca* L*.* | China, Xinjiang Uygur Autonomous Region, Huocheng county | 9 April 2019 | Wenwen Li, Liqiang Liu, Yannan Wang | DZGhcmd08 |
| *Prunus armeniaca* L*.* | China, Xinjiang Uygur Autonomous Region, Huocheng county | 9 April 2019 | Wenwen Li, Liqiang Liu, Yannan Wang | DZGhcmd09 |
| *Prunus armeniaca* L*.* | China, Xinjiang Uygur Autonomous Region, Huocheng county | 9 April 2019 | Wenwen Li, Liqiang Liu, Yannan Wang | DZGhcmd10 |
| *Prunus armeniaca* L*.* | China, Xinjiang Uygur Autonomous Region, Huocheng county | 9 April 2019 | Wenwen Li, Liqiang Liu, Yannan Wang | DZGhcmd11 |
| *Prunus armeniaca* L*.* | China, Xinjiang Uygur Autonomous Region, Huocheng county | 9 April 2019 | Wenwen Li, Liqiang Liu, Yannan Wang | DZGhcmd12 |
| *Prunus armeniaca* L*.* | China, Xinjiang Uygur Autonomous Region, Huocheng county | 9 April 2019 | Wenwen Li, Liqiang Liu, Yannan Wang | DZGhcmd13 |
| *Prunus armeniaca* L*.* | China, Xinjiang Uygur Autonomous Region, Huocheng county | 9 April 2019 | Wenwen Li, Liqiang Liu, Yannan Wang | DZGhcmd14 |
| *Prunus armeniaca* L*.* | China, Xinjiang Uygur Autonomous Region, Huocheng county | 9 April 2019 | Wenwen Li, Liqiang Liu, Yannan Wang | DZGhcmd15 |
| *Prunus armeniaca* L*.* | China, Xinjiang Uygur Autonomous Region, Huocheng county | 9 April 2019 | Wenwen Li, Liqiang Liu, Yannan Wang | DZGhcmd16 |
| *Prunus armeniaca* L*.* | China, Xinjiang Uygur Autonomous Region, Huocheng county | 9 April 2019 | Wenwen Li, Liqiang Liu, Yannan Wang | DZGhcmd103 |
| *Prunus armeniaca* L*.* | China, Xinjiang Uygur Autonomous Region, Huocheng county | 9 April 2019 | Wenwen Li, Liqiang Liu, Yannan Wang | DZGhcy17 |
| *Prunus armeniaca* L*.* | China, Xinjiang Uygur Autonomous Region, Huocheng county | 9 April 2019 | Wenwen Li, Liqiang Liu, Yannan Wang | DZGhcy18 |
| *Prunus armeniaca* L*.* | China, Xinjiang Uygur Autonomous Region, Huocheng county | 9 April 2019 | Wenwen Li, Liqiang Liu, Yannan Wang | DZGhcy19 |
| *Prunus armeniaca* L*.* | China, Xinjiang Uygur Autonomous Region, Huocheng county | 9 April 2019 | Wenwen Li, Liqiang Liu, Yannan Wang | DZGhcy20 |
| *Prunus armeniaca* L*.* | China, Xinjiang Uygur Autonomous Region, Huocheng county | 9 April 2019 | Wenwen Li, Liqiang Liu, Yannan Wang | DZGhcy21 |
| *Prunus armeniaca* L*.* | China, Xinjiang Uygur Autonomous Region, Huocheng county | 9 April 2019 | Wenwen Li, Liqiang Liu, Yannan Wang | DZGhcy22 |
| *Prunus armeniaca* L*.* | China, Xinjiang Uygur Autonomous Region, Huocheng county | 9 April 2019 | Wenwen Li, Liqiang Liu, Yannan Wang | DZGhcy23 |
| *Prunus armeniaca* L*.* | China, Xinjiang Uygur Autonomous Region, Huocheng county | 9 April 2019 | Wenwen Li, Liqiang Liu, Yannan Wang | DZGhcy24 |
| *Prunus armeniaca* L*.* | China, Xinjiang Uygur Autonomous Region, Huocheng county | 9 April 2019 | Wenwen Li, Liqiang Liu, Yannan Wang | DZGhcm26 |
| *Prunus armeniaca* L*.* | China, Xinjiang Uygur Autonomous Region, Huocheng county | 9 April 2019 | Wenwen Li, Liqiang Liu, Yannan Wang | DZGhcm27 |
| *Prunus armeniaca* L*.* | China, Xinjiang Uygur Autonomous Region, Huocheng county | 9 April 2019 | Wenwen Li, Liqiang Liu, Yannan Wang | DZGhcm28 |
| *Prunus armeniaca* L*.* | China, Xinjiang Uygur Autonomous Region, Huocheng county | 9 April 2019 | Wenwen Li, Liqiang Liu, Yannan Wang | DZGhcm29 |
| *Prunus armeniaca* L*.* | China, Xinjiang Uygur Autonomous Region, Huocheng county | 9 April 2019 | Wenwen Li, Liqiang Liu, Yannan Wang | DZGhcm30 |
| *Prunus armeniaca* L*.* | China, Xinjiang Uygur Autonomous Region, Huocheng county | 9 April 2019 | Wenwen Li, Liqiang Liu, Yannan Wang | DZGhcm31 |
| *Prunus armeniaca* L*.* | China, Xinjiang Uygur Autonomous Region, Huocheng county | 9 April 2019 | Wenwen Li, Liqiang Liu, Yannan Wang | DZGhcm32 |
| *Prunus armeniaca* L*.* | China, Xinjiang Uygur Autonomous Region, Huocheng county | 9 April 2019 | Wenwen Li, Liqiang Liu, Yannan Wang | DZGhcm33 |
| *Prunus armeniaca* L*.* | China, Xinjiang Uygur Autonomous Region, Huocheng county | 9 April 2019 | Wenwen Li, Liqiang Liu, Yannan Wang | DZGhcm34 |
| *Prunus armeniaca* L*.* | China, Xinjiang Uygur Autonomous Region, Huocheng county | 9 April 2019 | Wenwen Li, Liqiang Liu, Yannan Wang | DZGhcz92 |
| *Prunus armeniaca* L*.* | China, Xinjiang Uygur Autonomous Region, Huocheng county | 9 April 2019 | Wenwen Li, Liqiang Liu, Yannan Wang | DZGhcz93 |
| *Prunus armeniaca* L*.* | China, Xinjiang Uygur Autonomous Region, Huocheng county | 9 April 2019 | Wenwen Li, Liqiang Liu, Yannan Wang | DZGhcz94 |
| *Prunus armeniaca* L*.* | China, Xinjiang Uygur Autonomous Region, Huocheng county | 9 April 2019 | Wenwen Li, Liqiang Liu, Yannan Wang | DZGhcz95 |
| *Prunus armeniaca* L*.* | China, Xinjiang Uygur Autonomous Region, Huocheng county | 9 April 2019 | Wenwen Li, Liqiang Liu, Yannan Wang | DZGhcz96 |
| *Prunus armeniaca* L*.* | China, Xinjiang Uygur Autonomous Region, Yining county | 9 April 2019 | Wenwen Li, Liqiang Liu, Yannan Wang | DZGyn35 |
| *Prunus armeniaca* L*.* | China, Xinjiang Uygur Autonomous Region, Yining county | 9 April 2019 | Wenwen Li, Liqiang Liu, Yannan Wang | DZGyn37 |
| *Prunus armeniaca* L*.* | China, Xinjiang Uygur Autonomous Region, Yining county | 9 April 2019 | Wenwen Li, Liqiang Liu, Yannan Wang | DZGyn38 |
| *Prunus armeniaca* L*.* | China, Xinjiang Uygur Autonomous Region, Yining county | 9 April 2019 | Wenwen Li, Liqiang Liu, Yannan Wang | DZGyn39 |
| *Prunus armeniaca* L*.* | China, Xinjiang Uygur Autonomous Region, Yining county | 9 April 2019 | Wenwen Li, Liqiang Liu, Yannan Wang | DZGyn40 |
| *Prunus armeniaca* L*.* | China, Xinjiang Uygur Autonomous Region, Yining county | 9 April 2019 | Wenwen Li, Liqiang Liu, Yannan Wang | DZGyn41 |
| *Prunus armeniaca* L*.* | China, Xinjiang Uygur Autonomous Region, Yining county | 9 April 2019 | Wenwen Li, Liqiang Liu, Yannan Wang | DZGyn42 |
| *Prunus armeniaca* L*.* | China, Xinjiang Uygur Autonomous Region, Yining county | 9 April 2019 | Wenwen Li, Liqiang Liu, Yannan Wang | DZGyn43 |
| *Prunus armeniaca* L*.* | China, Xinjiang Uygur Autonomous Region, Yining county | 9 April 2019 | Wenwen Li, Liqiang Liu, Yannan Wang | DZGyn102 |
| *Prunus armeniaca* L*.* | China, Xinjiang Uygur Autonomous Region, Gongliu county | 9 April 2019 | Wenwen Li, Liqiang Liu, Yannan Wang | DZGglb50 |
| *Prunus armeniaca* L*.* | China, Xinjiang Uygur Autonomous Region, Gongliu county | 9 April 2019 | Wenwen Li, Liqiang Liu, Yannan Wang | DZGglb51 |
| *Prunus armeniaca* L*.* | China, Xinjiang Uygur Autonomous Region, Gongliu county | 9 April 2019 | Wenwen Li, Liqiang Liu, Yannan Wang | DZGglb52 |
| *Prunus armeniaca* L*.* | China, Xinjiang Uygur Autonomous Region, Gongliu county | 9 April 2019 | Wenwen Li, Liqiang Liu, Yannan Wang | DZGglb53 |
| *Prunus armeniaca* L*.* | China, Xinjiang Uygur Autonomous Region, Gongliu county | 9 April 2019 | Wenwen Li, Liqiang Liu, Yannan Wang | DZGglb54 |
| *Prunus armeniaca* L*.* | China, Xinjiang Uygur Autonomous Region, Gongliu county | 9 April 2019 | Wenwen Li, Liqiang Liu, Yannan Wang | DZGglb55 |
| *Prunus armeniaca* L*.* | China, Xinjiang Uygur Autonomous Region, Gongliu county | 9 April 2019 | Wenwen Li, Liqiang Liu, Yannan Wang | DZGglb56 |
| *Prunus armeniaca* L*.* | China, Xinjiang Uygur Autonomous Region, Gongliu county | 9 April 2019 | Wenwen Li, Liqiang Liu, Yannan Wang | DZGglb57 |
| *Prunus armeniaca* L*.* | China, Xinjiang Uygur Autonomous Region, Gongliu county | 9 April 2019 | Wenwen Li, Liqiang Liu, Yannan Wang | DZGglb58 |
| *Prunus armeniaca* L*.* | China, Xinjiang Uygur Autonomous Region, Gongliu county | 9 April 2019 | Wenwen Li, Liqiang Liu, Yannan Wang | DZGglb59 |
| *Prunus armeniaca* L*.* | China, Xinjiang Uygur Autonomous Region, Gongliu county | 9 April 2019 | Wenwen Li, Liqiang Liu, Yannan Wang | DZGglb97 |
| *Prunus armeniaca* L*.* | China, Xinjiang Uygur Autonomous Region, Gongliu county | 9 April 2019 | Wenwen Li, Liqiang Liu, Yannan Wang | DZGglb98 |
| *Prunus armeniaca* L*.* | China, Xinjiang Uygur Autonomous Region, Gongliu county | 9 April 2019 | Wenwen Li, Liqiang Liu, Yannan Wang | DZGglb99 |
| *Prunus armeniaca* L*.* | China, Xinjiang Uygur Autonomous Region, Gongliu county | 9 April 2019 | Wenwen Li, Liqiang Liu, Yannan Wang | DZGgld60 |
| *Prunus armeniaca* L*.* | China, Xinjiang Uygur Autonomous Region, Gongliu county | 9 April 2019 | Wenwen Li, Liqiang Liu, Yannan Wang | DZGgld61 |
| *Prunus armeniaca* L*.* | China, Xinjiang Uygur Autonomous Region, Gongliu county | 9 April 2019 | Wenwen Li, Liqiang Liu, Yannan Wang | DZGgld62 |
| *Prunus armeniaca* L*.* | China, Xinjiang Uygur Autonomous Region, Gongliu county | 9 April 2019 | Wenwen Li, Liqiang Liu, Yannan Wang | DZGgld64 |
| *Prunus armeniaca* L*.* | China, Xinjiang Uygur Autonomous Region, Gongliu county | 9 April 2019 | Wenwen Li, Liqiang Liu, Yannan Wang | DZGgld66 |
| *Prunus armeniaca* L*.* | China, Xinjiang Uygur Autonomous Region, Gongliu county | 9 April 2019 | Wenwen Li, Liqiang Liu, Yannan Wang | DZGglx100 |
| *Prunus armeniaca* L*.* | China, Xinjiang Uygur Autonomous Region, Gongliu county | 9 April 2019 | Wenwen Li, Liqiang Liu, Yannan Wang | DZGglx101 |
| *Prunus armeniaca* L*.* | China, Xinjiang Uygur Autonomous Region, Xinyuan county | 9 April 2019 | Wenwen Li, Liqiang Liu, Yannan Wang | DZGxyt67 |
| *Prunus armeniaca* L*.* | China, Xinjiang Uygur Autonomous Region, Xinyuan county | 9 April 2019 | Wenwen Li, Liqiang Liu, Yannan Wang | DZGxyt68 |
| *Prunus armeniaca* L*.* | China, Xinjiang Uygur Autonomous Region, Xinyuan county | 9 April 2019 | Wenwen Li, Liqiang Liu, Yannan Wang | DZGxyt69 |
| *Prunus armeniaca* L*.* | China, Xinjiang Uygur Autonomous Region, Xinyuan county | 9 April 2019 | Wenwen Li, Liqiang Liu, Yannan Wang | DZGxyt70 |
| *Prunus armeniaca* L*.* | China, Xinjiang Uygur Autonomous Region, Xinyuan county | 9 April 2019 | Wenwen Li, Liqiang Liu, Yannan Wang | DZGxyt71 |
| *Prunus armeniaca* L*.* | China, Xinjiang Uygur Autonomous Region, Xinyuan county | 9 April 2019 | Wenwen Li, Liqiang Liu, Yannan Wang | DZGxyt72 |
| *Prunus armeniaca* L*.* | China, Xinjiang Uygur Autonomous Region, Xinyuan county | 9 April 2019 | Wenwen Li, Liqiang Liu, Yannan Wang | DZGxyt73 |
| *Prunus armeniaca* L*.* | China, Xinjiang Uygur Autonomous Region, Xinyuan county | 9 April 2019 | Wenwen Li, Liqiang Liu, Yannan Wang | DZGxyt75 |
| *Prunus armeniaca* L*.* | China, Xinjiang Uygur Autonomous Region, Xinyuan county | 9 April 2019 | Wenwen Li, Liqiang Liu, Yannan Wang | DZGxyt76 |
| *Prunus armeniaca* L*.* | China, Xinjiang Uygur Autonomous Region, Xinyuan county | 9 April 2019 | Wenwen Li, Liqiang Liu, Yannan Wang | DZGxyt77 |
| *Prunus armeniaca* L*.* | China, Xinjiang Uygur Autonomous Region, Xinyuan county | 9 April 2019 | Wenwen Li, Liqiang Liu, Yannan Wang | DZGxya78 |
| *Prunus armeniaca* L*.* | China, Xinjiang Uygur Autonomous Region, Xinyuan county | 9 April 2019 | Wenwen Li, Liqiang Liu, Yannan Wang | DZGxya79 |
| *Prunus armeniaca* L*.* | China, Xinjiang Uygur Autonomous Region, Xinyuan county | 9 April 2019 | Wenwen Li, Liqiang Liu, Yannan Wang | DZGxya80 |
| *Prunus armeniaca* L*.* | China, Xinjiang Uygur Autonomous Region, Xinyuan county | 9 April 2019 | Wenwen Li, Liqiang Liu, Yannan Wang | DZGxyz81 |
| *Prunus armeniaca* L*.* | China, Xinjiang Uygur Autonomous Region, Xinyuan county | 9 April 2019 | Wenwen Li, Liqiang Liu, Yannan Wang | DZGxyz82 |
| *Prunus armeniaca* L*.* | China, Xinjiang Uygur Autonomous Region, Xinyuan county | 9 April 2019 | Wenwen Li, Liqiang Liu, Yannan Wang | DZGxyz83 |
| *Prunus armeniaca* L*.* | China, Xinjiang Uygur Autonomous Region, Xinyuan county | 9 April 2019 | Wenwen Li, Liqiang Liu, Yannan Wang | DZGxyz84 |
| *Prunus armeniaca* L*.* | China, Xinjiang Uygur Autonomous Region, Xinyuan county | 9 April 2019 | Wenwen Li, Liqiang Liu, Yannan Wang | DZGxyz85 |
| *Prunus armeniaca* L*.* | China, Xinjiang Uygur Autonomous Region, Xinyuan county | 9 April 2019 | Wenwen Li, Liqiang Liu, Yannan Wang | DZGxyz87 |
| *Prunus armeniaca* L*.* | China, Xinjiang Uygur Autonomous Region, Xinyuan county | 9 April 2019 | Wenwen Li, Liqiang Liu, Yannan Wang | DZGxyz88 |
| *Prunus armeniaca* L*.* | China, Xinjiang Uygur Autonomous Region, Xinyuan county | 9 April 2019 | Wenwen Li, Liqiang Liu, Yannan Wang | DZGxyz89 |
| *Prunus armeniaca* L*.* | China, Xinjiang Uygur Autonomous Region, Xinyuan county | 9 April 2019 | Wenwen Li, Liqiang Liu, Yannan Wang | DZGxyz90 |
| *Prunus armeniaca* L*.* | China, Xinjiang Uygur Autonomous Region, Xinyuan county | 12 April 2019 | Wenwen Li, Liqiang Liu, Yannan Wang | DZGxyz91 |
| *Prunus sibirica* L*.* | China, Liaoning Province, Xiongyue town | 12 April 2019 | Qiuping Zhang | NAG01 |
| *Prunus sibirica* L*.* | China, Liaoning Province, Xiongyue town | 12 April 2019 | Qiuping Zhang | NAG02 |
| *Prunus sibirica* L*.* | China, Liaoning Province, Xiongyue town | 12 April 2019 | Qiuping Zhang | NAG03 |
| *Prunus sibirica* L*.* | China, Liaoning Province, Xiongyue town | 12 April 2019 | Qiuping Zhang | NAG04 |
| Cultivated accessions |  |  |  |  |
| *P. armeniaca* ‘Early orange’ | China, Liaoning Province, Xiongyue town | 12 April 2019 | Qiuping Zhang | EG01 |
| *P. armeniaca* ‘Harcot’ | China, Liaoning Province, Xiongyue town | 12 April 2019 | Qiuping Zhang | EG02 |
| *P. armeniaca* ‘Jintaiyang’ | China, Liaoning Province, Xiongyue town | 12 April 2019 | Qiuping Zhang | EG03 |
| *P. armeniaca* ‘Meiguo 2’ | China, Liaoning Province, Xiongyue town | 12 April 2019 | Qiuping Zhang | EG04 |
| *P. armeniaca*‘Katy’ | China, Liaoning Province, Xiongyue town | 12 April 2019 | Qiuping Zhang | EG05 |
| *P. armeniaca* ‘Pisala' | China, Liaoning Province, Xiongyue town | 12 April 2019 | Qiuping Zhang | EG06 |
| *P. armeniaca* ‘Bergero’ | China, Liaoning Province, Xiongyue town | 12 April 2019 | Qiuping Zhang | EG08 |
| *P. armeniaca* ‘Honghebao’ | China, Xinjiang Uygur Autonomous Region, Luntai county | 25 March 2019 | Wenwen Li, Liqiang Liu, Yannan Wang | NCG01 |
| *P. armeniaca* ‘Erzhuanzi’ | China, Xinjiang Uygur Autonomous Region, Luntai county | 25 March 2019 | Wenwen Li, Liqiang Liu, Yannan Wang | NCG02 |
| *P. armeniaca* ‘Zhupishuixing’ | China, Xinjiang Uygur Autonomous Region, Luntai county | 25 March 2019 | Wenwen Li, Liqiang Liu, Yannan Wang | NCG03 |
| *P. armeniaca* ‘Hongyuxing’ | China, Xinjiang Uygur Autonomous Region, Luntai county | 25 March 2019 | Wenwen Li, Liqiang Liu, Yannan Wang | NCG04 |
| *P. armeniaca*‘Yinxiangbai’ | China, Xinjiang Uygur Autonomous Region, Luntai county | 25 March 2019 | Wenwen Li, Liqiang Liu, Yannan Wang | NCG05 |
| *P. armeniaca* ‘Yeyinbai’ | China, Liaoning Province, Xiongyue town | 12 April 2019 | Qiuping Zhang | NCG06 |
| *P. armeniaca* ‘Zhanggongyuandajiexing’ | China, Xinjiang Uygur Autonomous Region, Luntai county | 25 March 2019 | Wenwen Li, Liqiang Liu, Yannan Wang | NCG07 |
| *P. armeniaca* ‘Huangkouwai’ | China, Xinjiang Uygur Autonomous Region, Luntai county | 25 March 2019 | Wenwen Li, Liqiang Liu, Yannan Wang | NCG09 |
| *P. armeniaca* ‘Manaoxing’ | China, Xinjiang Uygur Autonomous Region, Luntai county | 25 March 2019 | Wenwen Li, Liqiang Liu, Yannan Wang | NCG10 |
| *P. armeniaca* ‘Jiamaihuang’ | China, Xinjiang Uygur Autonomous Region, Luntai county | 25 March 2019 | Wenwen Li, Liqiang Liu, Yannan Wang | NCG12 |
| *P. armeniaca* ‘Chaoxianbaixing’ | China, Liaoning Province, Xiongyue town | 12 April 2019 | Qiuping Zhang | NCG13 |
| *P. armeniaca* ‘Yiwofeng’ | China, Xinjiang Uygur Autonomous Region, Luntai county | 25 March 2019 | Wenwen Li, Liqiang Liu, Yannan Wang | NCG14 |
| *P. armeniaca* ‘Beixinnaer’ | China, Xinjiang Uygur Autonomous Region, Luntai county | 25 March 2019 | Wenwen Li, Liqiang Liu, Yannan Wang | NCG16 |
| *P. armeniaca* ‘Huiyangbaixing’ | China, Liaoning Province, Xiongyue town | 12 April 2019 | Qiuping Zhang | NCG17 |
| *P. armeniaca* ‘Kalahuanna’ | China, Xinjiang Uygur Autonomous Region, Luntai county | 25 March 2019 | Wenwen Li, Liqiang Liu, Yannan Wang | CAG02 |
| *P. armeniaca* ‘Kabakehuanna’ | China, Xinjiang Uygur Autonomous Region, Luntai county | 25 March 2019 | Wenwen Li, Liqiang Liu, Yannan Wang | CAG03 |
| *P. armeniaca* ‘Luopu 1’ | China, Xinjiang Uygur Autonomous Region, Luntai county | 25 March 2019 | Wenwen Li, Liqiang Liu, Yannan Wang | CAG04 |
| *P. armeniaca* ‘Kuikepiman’ | China, Xinjiang Uygur Autonomous Region, Luntai county | 25 March 2019 | Wenwen Li, Liqiang Liu, Yannan Wang | CAG05 |
| *P. armeniaca* ‘Akeyageleke’ | China, Xinjiang Uygur Autonomous Region, Luntai county | 25 March 2019 | Wenwen Li, Liqiang Liu, Yannan Wang | CAG06 |
| *P. armeniaca* ‘Jianali’ | China, Xinjiang Uygur Autonomous Region, Luntai county | 25 March 2019 | Wenwen Li, Liqiang Liu, Yannan Wang | CAG08 |
| *P. armeniaca* ‘Cuijianali’ | China, Xinjiang Uygur Autonomous Region, Luntai county | 25 March 2019 | Wenwen Li, Liqiang Liu, Yannan Wang | CAG09 |
| *P. armeniaca* ‘Hongdaike’ | China, Xinjiang Uygur Autonomous Region, Luntai county | 25 March 2019 | Wenwen Li, Liqiang Liu, Yannan Wang | CAG10 |
| *P. armeniaca* ‘Gumuxing’ | China, Xinjiang Uygur Autonomous Region, Luntai county | 25 March 2019 | Wenwen Li, Liqiang Liu, Yannan Wang | CAG12 |
| *P. armeniaca* ‘Yechengheiyexing’ | China, Xinjiang Uygur Autonomous Region, Luntai county | 25 March 2019 | Wenwen Li, Liqiang Liu, Yannan Wang | CAG15 |
| *P. armeniaca* ‘Cuheyexing’ | China, Xinjiang Uygur Autonomous Region, Luntai county | 25 March 2019 | Wenwen Li, Liqiang Liu, Yannan Wang | CAG16 |
| *P. armeniaca* ‘Hexieke’ | China, Xinjiang Uygur Autonomous Region, Luntai county | 25 March 2019 | Wenwen Li, Liqiang Liu, Yannan Wang | CAG18 |
| *P. armeniaca* ‘Saimaiti’ | China, Xinjiang Uygur Autonomous Region, Luntai county | 25 March 2019 | Wenwen Li, Liqiang Liu, Yannan Wang | CAG19 |
| *P. armeniaca* ‘Zaodayouxing’ | China, Xinjiang Uygur Autonomous Region, Luntai county | 25 March 2019 | Wenwen Li, Liqiang Liu, Yannan Wang | CAG21 |
| *P. armeniaca* ‘Kezilang’ | China, Xinjiang Uygur Autonomous Region, Luntai county | 25 March 2019 | Wenwen Li, Liqiang Liu, Yannan Wang | CAG23 |
| *P. armeniaca* ‘Wangenmao 2’ | China, Xinjiang Uygur Autonomous Region, Yingjisha county | 23 March 2019 | Wenwen Li, Liqiang Liu, Yannan Wang | CAG24 |
| *P. armeniaca* ‘Tuohuti’ | China, Xinjiang Uygur Autonomous Region, Luntai county | 25 March 2019 | Wenwen Li, Liqiang Liu, Yannan Wang | CAG25 |
| *P. armeniaca* ‘Mayisaimu’ | China, Xinjiang Uygur Autonomous Region, Yingjisha county | 23 March 2019 | Wenwen Li, Liqiang Liu, Yannan Wang | CAG26 |
| *P. armeniaca* ‘Suogeyageleke’ | China, Xinjiang Uygur Autonomous Region, Luntai county | 25 March 2019 | Wenwen Li, Liqiang Liu, Yannan Wang | CAG27 |
| *P. armeniaca* ‘Akeayi’ | China, Xinjiang Uygur Autonomous Region, Luntai county | 25 March 2019 | Wenwen Li, Liqiang Liu, Yannan Wang | CAG30 |
| *P. armeniaca* ‘Kezidalazi’ | China, Xinjiang Uygur Autonomous Region, Luntai county | 25 March 2019 | Wenwen Li, Liqiang Liu, Yannan Wang | CAG33 |
| *P. armeniaca* ‘Suluke’ | China, Xinjiang Uygur Autonomous Region, Luntai county | 25 March 2019 | Wenwen Li, Liqiang Liu, Yannan Wang | CAG34 |
| *P. armeniaca* ‘Huangqiligan’ | China, Xinjiang Uygur Autonomous Region, Luntai county | 25 March 2019 | Wenwen Li, Liqiang Liu, Yannan Wang | CAG35 |
| *P. armeniaca* ‘Kabakeximixi’ | China, Xinjiang Uygur Autonomous Region, Luntai county | 25 March 2019 | Wenwen Li, Liqiang Liu, Yannan Wang | CAG36 |
| *P. armeniaca*‘Lajiaoxing’ | China, Xinjiang Uygur Autonomous Region, Luntai county | 25 March 2019 | Wenwen Li, Liqiang Liu, Yannan Wang | CAG37 |
| *P. armeniaca* ‘Keziximixi’ | China, Xinjiang Uygur Autonomous Region, Luntai county | 25 March 2019 | Wenwen Li, Liqiang Liu, Yannan Wang | CAG38 |
| *P. armeniaca* ‘Dongxing’ | China, Xinjiang Uygur Autonomous Region, Luntai county | 25 March 2019 | Wenwen Li, Liqiang Liu, Yannan Wang | CAG40 |
| *P. armeniaca* ‘Ximixi’ | China, Xinjiang Uygur Autonomous Region, Luntai county | 25 March 2019 | Wenwen Li, Liqiang Liu, Yannan Wang | CAG41 |
| *P. armeniaca* ‘Dawuyuexing’ | China, Xinjiang Uygur Autonomous Region, Luntai county | 25 March 2019 | Wenwen Li, Liqiang Liu, Yannan Wang | CAG44 |
| *P. armeniaca*‘Pinaizi’ | China, Xinjiang Uygur Autonomous Region, Luntai county | 25 March 2019 | Wenwen Li, Liqiang Liu, Yannan Wang | CAG52 |
| *P. armeniaca* ‘Yingjishaxing’ | China, Xinjiang Uygur Autonomous Region, Luntai county | 25 March 2019 | Wenwen Li, Liqiang Liu, Yannan Wang | CAG54 |
| *P. armeniaca* ‘Xinong 40’ | China, Xinjiang Uygur Autonomous Region, Luntai county | 25 March 2019 | Wenwen Li, Liqiang Liu, Yannan Wang | CAG55 |
| *P. armeniaca* ‘Muzijianali’ | China, Xinjiang Uygur Autonomous Region, Luntai county | 25 March 2019 | Wenwen Li, Liqiang Liu, Yannan Wang | CAG56 |
| *P. armeniaca*‘Daisebaishaxing’ | China, Xinjiang Uygur Autonomous Region, Luntai county | 25 March 2019 | Wenwen Li, Liqiang Liu, Yannan Wang | CAG58 |
| *P. armeniaca*‘Kalaazang’ | China, Xinjiang Uygur Autonomous Region, Luntai county | 25 March 2019 | Wenwen Li, Liqiang Liu, Yannan Wang | CAG59 |
| *P. armeniaca*‘Sulian 2’ | China, Xinjiang Uygur Autonomous Region, Luntai county | 25 March 2019 | Wenwen Li, Liqiang Liu, Yannan Wang | CAG60 |
| *P. armeniaca* ‘Luopuhongdaike’ | China, Xinjiang Uygur Autonomous Region, Luntai county | 25 March 2019 | Wenwen Li, Liqiang Liu, Yannan Wang | CAG61 |
| *P. armeniaca* ‘Huanna’ | China, Xinjiang Uygur Autonomous Region, Luntai county | 25 March 2019 | Wenwen Li, Liqiang Liu, Yannan Wang | CAG63 |
| *P. armeniaca* ‘Tunaisitanhuanna’ | China, Xinjiang Uygur Autonomous Region, Luntai county | 25 March 2019 | Wenwen Li, Liqiang Liu, Yannan Wang | CAG64 |
| *P. armeniaca* ‘Sulian 4’ | China, Xinjiang Uygur Autonomous Region, Luntai county | 25 March 2019 | Wenwen Li, Liqiang Liu, Yannan Wang | CAG65 |
| *P. armeniaca* ‘Xiheiyexing’ | China, Xinjiang Uygur Autonomous Region, Luntai county | 25 March 2019 | Wenwen Li, Liqiang Liu, Yannan Wang | CAG66 |
| *P. armeniaca*‘Anjianghuanna’ | China, Xinjiang Uygur Autonomous Region, Luntai county | 25 March 2019 | Wenwen Li, Liqiang Liu, Yannan Wang | CAG68 |
| *P. armeniaca*‘Kezijianali’ | China, Xinjiang Uygur Autonomous Region, Luntai county | 25 March 2019 | Wenwen Li, Liqiang Liu, Yannan Wang | CAG69 |
| *P. armeniaca*‘Zhongshujianali’ | China, Xinjiang Uygur Autonomous Region, Luntai county | 25 March 2019 | Wenwen Li, Liqiang Liu, Yannan Wang | CAG70 |
| *P. armeniaca* ‘Tuohutikudu’ | China, Xinjiang Uygur Autonomous Region, Luntai county | 25 March 2019 | Wenwen Li, Liqiang Liu, Yannan Wang | CAG72 |
| *P. armeniaca* ‘Keerjihuanna’ | China, Xinjiang Uygur Autonomous Region, Yingjisha county | 23 March 2019 | Wenwen Li, Liqiang Liu, Yannan Wang | CAG73 |
| *P. armeniaca* ‘Heiyexing 2’ | China, Xinjiang Uygur Autonomous Region, Yingjisha county | 23 March 2019 | Wenwen Li, Liqiang Liu, Yannan Wang | CAG74 |
| *P. armeniaca* ‘Mamudaxixing’ | China, Xinjiang Uygur Autonomous Region, Yingjisha county | 23 March 2019 | Wenwen Li, Liqiang Liu, Yannan Wang | CAG75 |
| *P. armeniaca* ‘Mukayageleke’ | China, Xinjiang Uygur Autonomous Region, Luntai county | 25 March 2019 | Wenwen Li, Liqiang Liu, Yannan Wang | CAG76 |
| *P. armeniaca* ‘Yagelikeyulvke’ | China, Xinjiang Uygur Autonomous Region, Luntai county | 25 March 2019 | Wenwen Li, Liqiang Liu, Yannan Wang | CAG77 |
| *P. armeniaca* ‘Qiaoerpang’ | China, Xinjiang Uygur Autonomous Region, Yingjisha county | 23 March 2019 | Wenwen Li, Liqiang Liu, Yannan Wang | CAG78 |
| *P. armeniaca* ‘Huangsemaiti’ | China, Xinjiang Uygur Autonomous Region, Yingjisha county | 23 March 2019 | Wenwen Li, Liqiang Liu, Yannan Wang | CAG79 |
| *P. armeniaca* ‘Baisemaiti’ | China, Xinjiang Uygur Autonomous Region, Yingjisha county | 23 March 2019 | Wenwen Li, Liqiang Liu, Yannan Wang | CAG80 |
| *P. armeniaca* ‘Semaitiwang 132’ | China, Xinjiang Uygur Autonomous Region, Yingjisha county | 23 March 2019 | Wenwen Li, Liqiang Liu, Yannan Wang | CAG81 |
| *P. armeniaca* ‘Akedalazi’ | China, Xinjiang Uygur Autonomous Region, Luntai county | 25 March 2019 | Wenwen Li, Liqiang Liu, Yannan Wang | CAG82 |
| *P. armeniaca* ‘Afuhanxing’ | China, Xinjiang Uygur Autonomous Region, Luntai county | 25 March 2019 | Wenwen Li, Liqiang Liu, Yannan Wang | CAG83 |
| *P. armeniaca* ‘Ribenxing’ | China, Liaoning Province, Xiongyue town | 12 April 2019 | Qiuping Zhang | ECG02 |
| *P. mume* ‘Pinghexing’ | China, Liaoning Province, Xiongyue town | 12 April 2019 | Qiuping Zhang | ECG03 |
| *P. mume* ‘Xinshanwan’ | China, Liaoning Province, Xiongyue town | 12 April 2019 | Qiuping Zhang | ECG04 |

Table S2. Measurements of apricot pollen grains (n=30). Numerical expression: () ± SD; DZG, Dzhungar-Ili ecological group; CAG, Central Asian ecological group; NAG, Northeast Asian ecological group; EG, European ecological group; NCG, North China ecological group; ECG, Eastern China ecological group. P, pollen diameter; E, equatorial diameter; TDBR, distance between ridges; PD, punctum diameter.

| Code | Ecological group | P (*μm*) | E (*μm*) | P/E | Colpus (*μm*) | | Exine thickness (*μm*) | | | Ridge width (*μm*) | TDBR (*μm*) | PD (μm) | Porosity (*grain/μm2*) | Shape of pollen | Pollen size | Polar view | Exine  ornamentation |
| --- | --- | --- | --- | --- | --- | --- | --- | --- | --- | --- | --- | --- | --- | --- | --- | --- | --- |
| Length | Width | Exine | Sexine | Nexine |
| Wild accessions | | | | | | | | | | | | | | | | | |
| DZGhcmd01 | DZG | 37.51±1.64 | 25.55±1.35 | 1.47 | 34.68±1.89 | 7.99±0.63 | 1.23±0.05 | 0.74±0.07 | 0.49±0.04 | 0.28±0.04 | 0.40±0.07 | 0.38±0.04 | 0.19±0.07 | Prolate | Medium | Circular | Striate |
| DZGhcmd02 | DZG | 58.21±2.81 | 33.56±1.40 | 1.73 | 46.28±2.31 | 10.26±1.06 | 1.54±0.08 | 0.83±0.04 | 0.71±0.08 | 0.29±0.01 | 0.60±0.08 | 0.31±0.03 | 0.44±0.06 | Prolate | Large | Circular | Striate |
| DZGhcmd03 | DZG | 50.30±2.63 | 28.33±3.15 | 1.78 | 46.00±1.58 | 14.48±1.26 | 1.30±0.08 | 0.68±0.07 | 0.61±0.03 | 0.27±0.01 | 0.38±0.04 | 0.29±0.03 | 0.15±0.04 | Prolate | Large | Circular | Striate |
| DZGhcmd04 | DZG | 44.91±2.31 | 26.59±1.33 | 1.69 | 33.39±1.90 | 8.87±0.98 | 1.66±0.09 | 1.05±0.07 | 0.61±0.07 | 0.34±0.03 | 0.54±0.08 | 0.40±0.04 | 0.25±0.13 | Prolate | Medium | Circular | Striate |
| DZGhcmd05 | DZG | 42.53±2.49 | 22.88±3.05 | 1.86 | 40.70±2.38 | 10.29±1.04 | 1.96±0.14 | 1.16±0.07 | 0.80±0.10 | 0.26±0.02 | 0.25±0.02 | 0.31±0.06 | 1.02±0.11 | Prolate | Medium | Circular | Striate |
| DZGhcmd06 | DZG | 47.13±2.00 | 33.10±2.23 | 1.42 | 43.21±1.84 | 8.54±0.45 | 1.54±0.12 | 0.88±0.10 | 0.66±0.06 | 0.37±0.02 | 0.43±0.03 | 0.39±0.03 | 0.61±0.07 | Prolate | Medium | Circular | Striate |
| DZGhcmd07 | DZG | 53.95±2.03 | 32.48±1.30 | 1.66 | 48.23±1.81 | 13.79±1.04 | 1.77±0.07 | 1.17±0.05 | 0.61±0.05 | 0.24±0.03 | 0.49±0.07 | 0.34±0.02 | 0.55±0.06 | Prolate | Large | Circular | Striate |
| DZGhcmd08 | DZG | 41.55±2.27 | 25.79±3.44 | 1.61 | 36.57±2.00 | 4.07±0.88 | 1.77±0.09 | 1.15±0.06 | 0.61±0.05 | 0.27±0.03 | 0.40±0.05 | 0.37±0.06 | 0.42±0.19 | Prolate | Medium | Circular | Striate |
| DZGhcmd09 | DZG | 41.01±2.74 | 26.24±1.94 | 1.56 | 35.33±2.36 | 9.32±0.49 | 1.80±0.09 | 1.00±0.05 | 0.81±0.07 | 0.30±0.02 | 0.31±0.11 | 0.29±0.02 | 0.50±0.07 | Prolate | Medium | Circular | Striate |
| DZGhcmd10 | DZG | 55.30±2.50 | 30.02±1.60 | 1.84 | 49.29±2.23 | 7.83±0.47 | 1.33±0.02 | 0.71±0.04 | 0.62±0.03 | 0.28±0.02 | 0.56±0.07 | 0.42±0.13 | 0.61±0.07 | Prolate | Large | Circular | Striate |
| DZGhcmd11 | DZG | 53.72±3.19 | 30.66±2.32 | 1.75 | 52.81±3.13 | 8.50±0.54 | 1.64±0.08 | 0.90±0.08 | 0.74±0.04 | 0.27±0.02 | 0.27±0.02 | 0.33±0.05 | 0.05±0.03 | Prolate | Large | Circular | Striate |
| DZGhcmd12 | DZG | 41.19±3.64 | 27.75±1.06 | 1.48 | 35.06±3.10 | 5.97±0.88 | 1.27±0.08 | 0.66±0.04 | 0.61±0.07 | 0.38±0.04 | 0.57±0.06 | 0.36±0.05 | 0.17±0.04 | Prolate | Medium | Circular | Cerebroid ornamentation |
| DZGhcmd13 | DZG | 45.52±3.08 | 26.02±2.03 | 1.75 | 38.87±2.63 | 10.76±0.76 | 1.65±0.10 | 0.99±0.07 | 0.66±0.05 | 0.30±0.02 | 0.45±0.11 | 0.21±0.03 | 0.13±0.09 | Prolate | Medium | Circular | Striate |
| DZGhcmd14 | DZG | 52.10±2.06 | 36.23±1.75 | 1.44 | 43.92±1.74 | 7.13±1.36 | 1.64±0.04 | 0.92±0.05 | 0.71±0.04 | 0.32±0.04 | 0.41±0.04 | 0.26±0.03 | 0.04±0.02 | Prolate | Large | Circular | Striate |
| DZGhcmd15 | DZG | 37.26±2.22 | 23.86±1.33 | 1.56 | 32.63±1.94 | 4.61±0.37 | 2.08±0.12 | 1.24±0.11 | 0.84±0.03 | 0.29±0.02 | 0.52±0.04 | 0.20±0.02 | 0.37±0.10 | Prolate | Medium | Circular | Striate |
| DZGhcmd16 | DZG | 45.06±2.21 | 27.56±1.45 | 1.64 | 41.89±2.06 | 7.81±0.87 | 2.02±0.10 | 1.24±0.05 | 0.78±0.07 | 0.38±0.03 | 0.47±0.09 | 0.28±0.05 | 0.13±0.02 | Prolate | Medium | Circular | Striate |
| DZGhcmd103 | DZG | 41.69±2.80 | 28.31±2.97 | 1.47 | 37.72±2.53 | 8.32±0.79 | 1.47±0.10 | 0.81±0.08 | 0.66±0.07 | 0.36±0.03 | 0.54±0.05 | 0.39±0.06 | 0.06±0.05 | Prolate | Medium | Circular | Striate |
| DZGhcy17 | DZG | 56.50±1.84 | 31.40±2.56 | 1.80 | 51.98±1.69 | 5.60±0.57 | 1.64±0.07 | 0.81±0.06 | 0.83±0.05 | 0.39±0.03 | 0.60±0.09 | 0.25±0.02 | 1.26±0.29 | Prolate | Large | Circular | Striate |
| DZGhcy18 | DZG | 51.58±1.30 | 36.73±2.20 | 1.40 | 52.06±1.31 | 6.66±0.66 | 1.22±0.08 | 0.58±0.05 | 0.64±0.05 | 0.26±0.04 | 0.39±0.08 | 0.36±0.05 | 0.26±0.09 | Prolate | Large | Circular | Striate |
| DZGhcy19 | DZG | 39.00±2.04 | 22.43±1.21 | 1.74 | 34.88±1.82 | 9.87±0.88 | 2.00±0.05 | 1.07±0.03 | 0.93±0.05 | 0.31±0.03 | 0.52±0.09 | 0.31±0.09 | 0.26±0.04 | Prolate | Medium | Circular | Striate |
| DZGhcy20 | DZG | 49.37±2.44 | 33.21±0.99 | 1.49 | 42.94±2.12 | 12.67±0.83 | 1.89±0.07 | 1.10±0.05 | 0.79±0.05 | 0.31±0.02 | 0.30±0.09 | 0.22±0.06 | 0.24±0.07 | Prolate | Medium | Circular | Striate |
| DZGhcy21 | DZG | 43.92±2.41 | 28.02±2.29 | 1.57 | 37.36±2.05 | 10.01±1.21 | 1.97±0.06 | 1.07±0.04 | 0.90±0.05 | 0.23±0.03 | 0.44±0.08 | 0.45±0.08 | 0.40±0.07 | Prolate | Medium | Circular | Striate |
| DZGhcy22 | DZG | 49.98±3.51 | 26.00±2.00 | 1.92 | 45.01±3.16 | 6.72±0.91 | 1.78±0.05 | 1.02±0.03 | 0.77±0.06 | 0.26±0.04 | 0.44±0.08 | 0.37±0.06 | 0.15±0.02 | Prolate | Medium | Circular | Striate |
| DZGhcy23 | DZG | 48.71±3.11 | 33.53±1.88 | 1.45 | 41.62±2.66 | 7.74±0.38 | 2.09±0.07 | 1.00±0.08 | 1.09±0.06 | 0.21±0.02 | 0.32±0.08 | 0.41±0.07 | 0.25±0.04 | Prolate | Medium | Circular | Striate |
| DZGhcy24 | DZG | 46.20±2.86 | 34.64±1.41 | 1.33 | 40.38±2.50 | 7.26±0.59 | 3.28±0.11 | 1.77±0.08 | 1.51±0.07 | 0.27±0.02 | 0.35±0.05 | 0.26±0.06 | 0.09±0.04 | Prolate | Medium | Circular | Striate |
| DZGhcm26 | DZG | 52.62±2.26 | 32.03±1.74 | 1.64 | 43.72±1.88 | 8.22±0.58 | 1.28±0.04 | 0.59±0.03 | 0.69±0.04 | 0.29±0.03 | 0.47±0.10 | 0.24±0.05 | 0.19±0.04 | Prolate | Large | Circular | Striate |
| DZGhcm27 | DZG | 42.98±1.62 | 22.32±2.29 | 1.93 | 40.67±1.53 | 6.74±0.50 | 1.75±0.08 | 1.00±0.03 | 0.75±0.06 | 0.32±0.03 | 0.42±0.11 | 0.71±0.18 | 0.86±0.26 | Prolate | Medium | Circular | Striato-reticulate ornamentation |
| DZGhcm28 | DZG | 40.38±2.40 | 30.13±1.97 | 1.34 | 33.59±2.00 | 14.06±0.94 | 1.99±0.05 | 1.08±0.03 | 0.91±0.03 | 0.24±0.02 | 0.31±0.03 | 0.21±0.04 | 0.05±0.08 | Prolate | Medium | Circular | Striate |
| DZGhcm29 | DZG | 41.57±2.30 | 25.60±1.31 | 1.62 | 34.83±1.93 | 8.23±0.86 | 1.60±0.04 | 0.91±0.02 | 0.69±0.03 | 0.33±0.02 | 0.52±0.09 | 0.69±0.14 | 0.40±0.04 | Prolate | Medium | Circular | Striate |
| DZGhcm30 | DZG | 42.84±2.05 | 26.70±1.01 | 1.60 | 36.02±1.73 | 8.95±0.60 | 2.05±0.10 | 1.04±0.03 | 1.01±0.08 | 0.36±0.04 | 0.44±0.10 | 0.32±0.07 | 0.12±0.04 | Prolate | Medium | Circular | Striate |
| DZGhcm31 | DZG | 41.96±1.61 | 27.00±1.11 | 1.55 | 36.68±1.41 | 5.30±0.48 | 1.76±0.06 | 0.97±0.05 | 0.79±0.04 | 0.27±0.02 | 0.37±0.08 | 0.22±0.06 | 0.03±0.01 | Prolate | Medium | Circular | Striate |
| DZGhcm32 | DZG | 52.30±3.04 | 33.30±1.63 | 1.57 | 50.56±2.94 | 11.14±0.65 | 1.74±0.08 | 0.89±0.07 | 0.85±0.07 | 0.26±0.03 | 0.25±0.06 | 0.24±0.03 | 0.08±0.05 | Prolate | Large | Circular | Striate |
| DZGhcm33 | DZG | 40.73±1.47 | 28.74±1.20 | 1.42 | 34.45±1.25 | 6.53±0.37 | 2.03±0.09 | 1.18±0.08 | 0.85±0.06 | 0.26±0.03 | 0.29±0.07 | 0.43±0.09 | 0.42±0.14 | Prolate | Medium | Circular | Striate |
| DZGhcm34 | DZG | 36.56±1.52 | 23.76±1.92 | 1.54 | 33.07±1.38 | 9.01±0.99 | 1.76±0.05 | 1.00±0.04 | 0.76±0.05 | 0.22±0.05 | 0.43±0.04 | 0.30±0.07 | 0.44±0.08 | Prolate | Medium | Circular | Striate |
| DZGhcz92 | DZG | 47.27±2.10 | 29.76±1.36 | 1.59 | 39.36±1.75 | 6.70±0.53 | 1.58±0.05 | 0.79±0.04 | 0.79±0.03 | 0.36±0.02 | 0.56±0.07 | 0.25±0.04 | 1.00±0.27 | Prolate | Medium | Circular | Striate |
| DZGhcz93 | DZG | 39.83±1.86 | 25.56±1.74 | 1.56 | 34.94±1.64 | 7.89±0.74 | 1.63±0.07 | 0.91±0.05 | 0.72±0.06 | 0.34±0.03 | 0.59±0.10 | 0.20±0.03 | 1.64±0.11 | Prolate | Medium | Circular | Striate |
| DZGhcz94 | DZG | 44.38±1.54 | 27.57±1.57 | 1.61 | 40.86±1.41 | 8.20±0.83 | 2.11±0.08 | 1.37±0.05 | 0.75±0.04 | 0.44±0.04 | 0.66±0.06 | 0.65±0.10 | 0.79±0.11 | Prolate | Medium | Circular | Striate |
| DZGhcz95 | DZG | 51.87±2.61 | 30.32±2.40 | 1.71 | 46.85±2.36 | 6.57±0.55 | 2.01±0.10 | 1.29±0.06 | 0.72±0.05 | 0.30±0.04 | 0.46±0.05 | 0.34±0.05 | 0.20±0.04 | Prolate | Large | Circular | Striate |
| DZGhcz96 | DZG | 43.47±2.75 | 26.19±2.14 | 1.66 | 37.67±2.38 | 10.75±0.71 | 1.71±0.07 | 0.96±0.04 | 0.75±0.06 | 0.26±0.03 | 0.37±0.06 | 0.36±0.05 | 0.21±0.04 | Prolate | Medium | Circular | Striate |
| DZGyn35 | DZG | 50.12±2.42 | 29.54±2.03 | 1.70 | 45.34±2.19 | 7.12±0.47 | 1.62±0.09 | 0.85±0.06 | 0.77±0.06 | 0.33±0.04 | 0.45±0.07 | 0.38±0.09 | 0.28±0.09 | Prolate | Large | Circular | Striate |
| DZGyn37 | DZG | 40.85±1.06 | 28.17±1.70 | 1.45 | 38.04±0.99 | 7.69±0.88 | 1.89±0.09 | 1.12±0.05 | 0.77±0.07 | 0.23±0.02 | 0.41±0.03 | 0.26±0.06 | 0.70±0.18 | Prolate | Medium | Circular | Striate |
| DZGyn38 | DZG | 41.63±1.53 | 27.77±2.46 | 1.50 | 37.16±1.37 | 7.95±0.92 | 2.45±0.18 | 1.32±0.07 | 1.12±0.13 | 0.37±0.05 | 0.45±0.09 | 0.52±0.11 | 1.66±0.17 | Prolate | Medium | Circular | Striate |
| DZGyn39 | DZG | 42.11±1.65 | 24.35±2.01 | 1.73 | 32.50±1.27 | 9.78±0.67 | 2.02±0.07 | 1.12±0.06 | 0.91±0.05 | 0.27±0.03 | 0.39±0.09 | 0.46±0.08 | 0.71±0.12 | Prolate | Medium | Circular | Striate |
| DZGyn40 | DZG | 53.86±3.79 | 34.77±3.06 | 1.55 | 49.83±3.50 | 11.46±0.99 | 1.72±0.08 | 1.06±0.04 | 0.66±0.05 | 0.26±0.03 | 0.39±0.06 | 0.40±0.12 | 0.47±0.05 | Prolate | Large | Circular | Striate |
| DZGyn41 | DZG | 49.02±2.58 | 33.90±2.88 | 1.45 | 46.56±2.45 | 10.45±0.79 | 1.73±0.07 | 0.95±0.04 | 0.78±0.05 | 0.31±0.03 | 0.36±0.04 | 0.29±0.09 | 0.39±0.06 | Prolate | Medium | Circular | Striate |
| DZGyn42 | DZG | 40.97±1.03 | 28.96±1.36 | 1.41 | 36.99±0.93 | 10.94±0.99 | 1.83±0.10 | 0.96±0.05 | 0.88±0.07 | 0.28±0.03 | 0.40±0.09 | 0.37±0.08 | 0.53±0.12 | Prolate | Medium | Circular | Striate |
| DZGyn43 | DZG | 47.87±2.07 | 27.27±1.82 | 1.76 | 42.77±1.85 | 7.05±0.62 | 1.92±0.05 | 1.21±0.07 | 0.72±0.05 | 0.29±0.03 | 0.29±0.08 | 0.45±0.13 | 2.42±0.29 | Prolate | Medium | Circular | Striate |
| DZGyn102 | DZG | 40.12±2.49 | 30.92±2.05 | 1.30 | 34.52±2.15 | 9.72±1.00 | 1.69±0.09 | 0.97±0.04 | 0.72±0.06 | 0.33±0.05 | 0.50±0.10 | 0.30±0.08 | 0.64±0.12 | Subprolate | Medium | Circular | Striate |
| DZGglb50 | DZG | 46.91±3.14 | 31.97±2.29 | 1.47 | 44.39±2.97 | 8.08±0.94 | 1.68±0.04 | 0.85±0.04 | 0.82±0.04 | 0.31±0.03 | 0.51±0.04 | 0.24±0.06 | 0.44±0.12 | Prolate | Medium | Circular | Striate |
| DZGglb51 | DZG | 43.76±2.19 | 28.77±1.82 | 1.52 | 27.33±2.17 | 8.91±0.53 | 1.63±0.08 | 0.98±0.06 | 0.65±0.04 | 0.37±0.03 | 0.33±0.04 | 0.00±0.00 | 0.00±0.00 | Prolate | Medium | Triangular | Striate |
| DZGglb52 | DZG | 42.62±2.03 | 23.40±1.91 | 1.82 | 37.26±1.78 | 6.57±0.79 | 1.75±0.09 | 1.09±0.07 | 0.66±0.06 | 0.27±0.02 | 0.33±0.04 | 0.20±0.03 | 0.00±0.04 | Prolate | Medium | Circular | Striate |
| DZGglb53 | DZG | 42.38±2.32 | 26.70±1.70 | 1.59 | 34.88±1.91 | 10.15±1.21 | 1.76±0.11 | 1.07±0.09 | 0.69±0.05 | 0.27±0.02 | 0.38±0.07 | 0.24±0.04 | 0.35±0.06 | Prolate | Medium | Circular | Striate |
| DZGglb54 | DZG | 43.09±2.57 | 27.09±2.27 | 1.59 | 37.56±2.24 | 7.49±0.58 | 2.16±0.26 | 1.28±0.06 | 0.87±0.26 | 0.30±0.02 | 0.50±0.06 | 0.22±0.04 | 0.08±0.04 | Prolate | Medium | Circular | Striate |
| DZGglb55 | DZG | 38.39±1.93 | 23.34±1.45 | 1.64 | 35.41±1.78 | 5.96±0.65 | 1.61±0.07 | 1.07±0.06 | 0.54±0.05 | 0.32±0.05 | 0.52±0.07 | 0.39±0.11 | 0.96±0.16 | Prolate | Medium | Circular | Striate |
| DZGglb56 | DZG | 42.23±2.37 | 28.74±1.40 | 1.47 | 37.63±2.11 | 9.93±0.95 | 1.86±0.10 | 1.02±0.06 | 0.84±0.07 | 0.26±0.02 | 0.43±0.05 | 0.35±0.07 | 0.61±0.15 | Prolate | Medium | Circular | Striate |
| DZGglb57 | DZG | 48.86±2.64 | 27.64±2.14 | 1.77 | 44.51±2.41 | 11.32±1.49 | 1.65±0.10 | 0.94±0.05 | 0.71±0.06 | 0.34±0.03 | 0.54±0.11 | 0.39±0.10 | 0.57±0.19 | Prolate | Medium | Circular | Striate |
| DZGglb58 | DZG | 42.25±2.81 | 24.47±1.89 | 1.73 | 35.60±2.37 | 4.77±0.91 | 1.49±0.09 | 0.86±0.05 | 0.64±0.07 | 0.30±0.04 | 0.38±0.06 | 0.40±0.06 | 0.59±0.08 | Prolate | Medium | Circular | Striate |
| DZGglb59 | DZG | 42.46±1.68 | 25.68±1.08 | 1.65 | 15.38±0.61 | 6.58±0.49 | 2.23±0.16 | 1.37±0.12 | 0.86±0.07 | 0.26±0.01 | 0.32±0.04 | 0.00±0.00 | 0.00±0.00 | Prolate | Medium | Triangular | Striate |
| DZGglb97 | DZG | 43.46±2.32 | 26.49±1.08 | 1.64 | 13.59±0.73 | 5.40±0.33 | 1.94±0.09 | 1.17±0.07 | 0.77±0.04 | 0.36±0.04 | 0.37±0.05 | 0.00±0.00 | 0.00±0.00 | Prolate | Medium | Triangular | Striate |
| DZGglb98 | DZG | 39.17±1.57 | 24.17±1.35 | 1.62 | 34.17±1.37 | 5.90±0.88 | 2.22±0.15 | 1.23±0.10 | 0.99±0.08 | 0.32±0.03 | 0.38±0.09 | 0.36±0.09 | 0.62±0.19 | Prolate | Medium | Circular | Striate |
| DZGglb99 | DZG | 39.02±1.70 | 29.41±1.66 | 1.33 | 7.07±0.58 | 6.74±0.77 | 1.79±0.08 | 1.00±0.05 | 0.79±0.05 | 0.40±0.09 | 0.39±0.05 | 0.00±0.00 | 0.00±0.00 | Subprolate | Medium | Triangular | Striate |
| DZGgld60 | DZG | 42.36±2.03 | 25.90±1.24 | 1.64 | 37.45±1.80 | 15.65±2.16 | 1.82±0.07 | 0.92±0.06 | 0.90±0.07 | 0.36±0.03 | 0.39±0.07 | 0.28±0.04 | 0.55±0.06 | Prolate | Medium | Circular | Striate |
| DZGgld61 | DZG | 38.67±3.16 | 27.46±2.04 | 1.41 | 31.81±2.60 | 6.59±1.01 | 1.69±0.11 | 0.97±0.06 | 0.72±0.06 | 0.29±0.02 | 0.27±0.05 | 0.15±0.03 | 0.02±0.01 | Prolate | Medium | Circular | Striate |
| DZGgld62 | DZG | 51.04±2.53 | 30.25±2.21 | 1.69 | 47.14±2.33 | 13.06±0.81 | 1.31±0.09 | 0.74±0.05 | 0.57±0.05 | 0.27±0.02 | 0.58±0.09 | 0.40±0.09 | 0.75±0.10 | Prolate | Large | Circular | Striate |
| DZGgld64 | DZG | 41.37±2.33 | 26.78±3.43 | 1.55 | 36.89±2.08 | 8.60±0.84 | 1.88±0.07 | 0.97±0.05 | 0.91±0.06 | 0.28±0.02 | 0.35±0.06 | 0.45±0.09 | 0.17±0.10 | Prolate | Medium | Circular | Striate |
| DZGgld66 | DZG | 41.64±1.91 | 26.21±2.14 | 1.59 | 32.44±1.48 | 7.86±1.05 | 1.78±0.11 | 0.95±0.06 | 0.84±0.06 | 0.32±0.04 | 0.50±0.05 | 0.24±0.05 | 0.35±0.20 | Prolate | Medium | Circular | Striate |
| DZGglx100 | DZG | 51.47±1.74 | 36.93±2.75 | 1.39 | 43.86±1.48 | 9.33±0.62 | 1.85±0.07 | 1.04±0.04 | 0.81±0.08 | 0.23±0.02 | 0.38±0.05 | 0.20±0.08 | 0.04±0.03 | Prolate | Large | Circular | Striate |
| DZGglx101 | DZG | 38.96±3.32 | 24.78±1.82 | 1.57 | 35.64±3.04 | 7.41±1.05 | 1.64±0.07 | 0.96±0.06 | 0.68±0.03 | 0.24±0.03 | 0.33±0.04 | 0.25±0.08 | 0.00±0.01 | Prolate | Medium | Circular | Striate |
| DZGxyt67 | DZG | 47.03±2.33 | 25.03±1.53 | 1.88 | 39.90±1.97 | 12.59±1.48 | 1.62±0.11 | 0.99±0.07 | 0.63±0.06 | 0.31±0.02 | 0.53±0.08 | 0.37±0.08 | 0.41±0.10 | Prolate | Medium | Circular | Striate |
| DZGxyt68 | DZG | 41.49±2.76 | 24.57±3.51 | 1.69 | 38.54±2.56 | 6.37±1.84 | 2.08±0.12 | 1.21±0.06 | 0.86±0.07 | 0.30±0.04 | 0.35±0.06 | 0.36±0.08 | 0.31±0.10 | Prolate | Medium | Circular | Striate |
| DZGxyt69 | DZG | 40.96±2.12 | 23.77±2.09 | 1.72 | 38.55±2.00 | 7.63±1.12 | 1.79±0.06 | 0.96±0.06 | 0.82±0.04 | 0.19±0.03 | 0.43±0.08 | 0.15±0.04 | 0.04±0.02 | Prolate | Medium | Circular | Striate |
| DZGxyt70 | DZG | 36.11±1.53 | 22.49±1.39 | 1.61 | 27.04±1.15 | 8.60±0.87 | 1.85±0.08 | 0.91±0.04 | 0.93±0.05 | 0.21±0.05 | 0.32±0.07 | 0.45±0.09 | 0.66±0.10 | Prolate | Medium | Circular | Striate |
| DZGxyt71 | DZG | 48.76±3.10 | 24.47±1.90 | 1.99 | 41.27±2.62 | 10.19±1.06 | 2.05±0.09 | 1.14±0.07 | 0.92±0.07 | 0.30±0.03 | 0.39±0.06 | 0.31±0.04 | 0.44±0.11 | Prolate | Medium | Circular | Striate |
| DZGxyt72 | DZG | 40.26±1.27 | 21.44±2.73 | 1.88 | 34.08±1.07 | 6.68±0.80 | 1.88±0.07 | 1.01±0.05 | 0.86±0.05 | 0.24±0.02 | 0.39±0.04 | 0.31±0.07 | 0.69±0.08 | Prolate | Medium | Circular | Striate |
| DZGxyt73 | DZG | 50.55±1.99 | 34.20±1.80 | 1.48 | 44.03±1.73 | 9.61±1.11 | 1.71±0.07 | 1.14±0.09 | 0.57±0.05 | 0.32±0.05 | 0.42±0.06 | 0.28±0.05 | 0.27±0.11 | Prolate | Large | Circular | Striate |
| DZGxyt75 | DZG | 58.36±2.56 | 31.48±2.37 | 1.85 | 47.35±2.08 | 7.90±0.81 | 1.50±0.06 | 0.86±0.04 | 0.65±0.04 | 0.26±0.03 | 0.35±0.05 | 0.36±0.10 | 0.35±0.06 | Prolate | Large | Circular | Striate |
| DZGxyt76 | DZG | 40.80±1.83 | 25.24±1.55 | 1.62 | 34.49±1.55 | 6.58±0.68 | 1.98±0.09 | 0.93±0.05 | 1.05±0.08 | 0.32±0.03 | 0.46±0.03 | 0.22±0.04 | 2.20±0.33 | Prolate | Medium | Circular | Striate |
| DZGxyt77 | DZG | 48.35±3.26 | 28.17±1.85 | 1.72 | 42.50±2.87 | 8.36±0.94 | 2.20±0.16 | 1.21±0.11 | 0.99±0.09 | 0.40±0.05 | 0.48±0.05 | 0.36±0.07 | 0.15±0.12 | Prolate | Medium | Circular | Striate |
| DZGxya78 | DZG | 42.59±2.12 | 28.95±1.35 | 1.47 | 31.60±2.24 | 5.18±0.89 | 1.51±0.07 | 0.91±0.04 | 0.60±0.06 | 0.36±0.02 | 0.44±0.07 | 0.00±0.00 | 0.00±0.00 | Prolate | Medium | Triangular | Striate |
| DZGxya79 | DZG | 42.23±1.23 | 27.76±1.73 | 1.52 | 35.11±1.11 | 5.79±1.01 | 1.88±0.10 | 1.10±0.09 | 0.78±0.06 | 0.33±0.02 | 0.45±0.04 | 0.00±0.00 | 0.00±0.00 | Prolate | Medium | Triangular | Striate |
| DZGxya80 | DZG | 34.58±2.34 | 23.15±1.48 | 1.49 | 28.37±1.92 | 6.02±0.98 | 2.11±0.06 | 1.18±0.05 | 0.93±0.08 | 0.30±0.03 | 0.41±0.03 | 0.25±0.13 | 0.05±0.02 | Prolate | Medium | Circular | Striate |
| DZGxyz81 | DZG | 42.14±1.87 | 25.26±2.46 | 1.67 | 36.34±1.61 | 9.11±1.99 | 1.70±0.07 | 0.90±0.04 | 0.81±0.05 | 0.37±0.04 | 0.49±0.08 | 0.25±0.07 | 0.34±0.08 | Prolate | Medium | Circular | Striate |
| DZGxyz82 | DZG | 42.39±1.71 | 23.88±1.64 | 1.78 | 36.63±1.48 | 5.46±1.27 | 1.57±0.06 | 0.93±0.04 | 0.64±0.04 | 0.32±0.03 | 0.55±0.06 | 0.27±0.09 | 0.30±0.11 | Prolate | Medium | Circular | Striate |
| DZGxyz83 | DZG | 33.46±1.90 | 25.38±2.15 | 1.32 | 26.98±1.53 | 10.32±1.71 | 1.84±0.13 | 1.04±0.08 | 0.80±0.08 | 0.35±0.04 | 0.51±0.07 | 0.54±0.11 | 0.51±0.08 | Subprolate | Medium | Circular | Striate |
| DZGxyz84 | DZG | 43.64±2.11 | 27.42±2.46 | 1.59 | 37.79±1.83 | 8.59±0.80 | 2.09±0.11 | 1.09±0.06 | 1.00±0.07 | 0.24±0.03 | 0.38±0.04 | 0.20±0.05 | 0.30±0.08 | Prolate | Medium | Circular | Striate |
| DZGxyz85 | DZG | 41.15±2.33 | 28.91±2.25 | 1.42 | 36.83±2.09 | 6.25±0.82 | 2.14±0.20 | 1.27±0.08 | 0.87±0.22 | 0.27±0.03 | 0.40±0.06 | 0.24±0.05 | 0.09±0.07 | Prolate | Medium | Circular | Striate |
| DZGxyz87 | DZG | 32.41±2.02 | 23.10±2.09 | 1.40 | 26.52±1.66 | 13.21±1.87 | 1.62±0.07 | 0.99±0.07 | 0.63±0.03 | 0.24±0.03 | 0.38±0.04 | 0.43±0.13 | 0.58±0.12 | Prolate | Medium | Circular | Striate |
| DZGxyz88 | DZG | 41.69±1.92 | 23.86±1.39 | 1.75 | 35.75±1.65 | 6.46±0.75 | 1.85±0.08 | 1.07±0.05 | 0.78±0.06 | 0.13±0.04 | 0.45±0.04 | 0.39±0.09 | 0.17±0.05 | Prolate | Medium | Circular | Striate |
| DZGxyz89 | DZG | 38.03±2.06 | 25.40±1.92 | 1.50 | 30.36±1.64 | 12.44±1.75 | 2.35±0.10 | 1.41±0.09 | 0.94±0.04 | 0.21±0.01 | 0.29±0.03 | 0.24±0.06 | 0.00±0.03 | Prolate | Medium | Circular | Striate |
| DZGxyz90 | DZG | 38.68±1.99 | 24.59±1.37 | 1.57 | 33.53±1.73 | 8.29±0.53 | 1.73±0.09 | 0.91±0.06 | 0.81±0.05 | 0.35±0.04 | 0.38±0.04 | 0.19±0.03 | 0.67±0.23 | Prolate | Medium | Circular | Striate |
| DZGxyz91 | DZG | 40.70±1.62 | 22.34±1.78 | 1.82 | 37.13±1.48 | 10.42±0.50 | 1.78±0.05 | 1.04±0.04 | 0.74±0.05 | 0.31±0.02 | 0.41±0.06 | 0.33±0.08 | 0.23±0.09 | Prolate | Medium | Circular | Striate |
| NAG01 | NAG | 49.00±3.14 | 31.62±2.75 | 1.55 | 43.30±2.77 | 3.40±1.33 | 1.14±0.05 | 0.63±0.04 | 0.51±0.02 | 0.26±0.02 | 0.42±0.10 | 0.29±0.07 | 0.85±0.16 | Prolate | Medium | Circular | Striate |
| NAG02 | NAG | 46.80±2.75 | 31.21±1.69 | 1.50 | 38.83±2.28 | 9.43±1.27 | 1.82±0.08 | 1.04±0.07 | 0.78±0.04 | 0.31±0.05 | 0.57±0.10 | 0.36±0.13 | 0.99±0.06 | Prolate | Medium | Circular | Striate |
| NAG03 | NAG | 36.25±2.63 | 25.10±2.84 | 1.44 | 33.40±2.42 | 5.33±0.74 | 1.58±0.07 | 0.84±0.02 | 0.75±0.07 | 0.31±0.03 | 0.47±0.07 | 0.20±0.11 | 1.40±0.17 | Prolate | Medium | Circular | Striate |
| NAG04 | NAG | 51.59±1.90 | 31.48±1.58 | 1.64 | 46.63±1.72 | 9.04±0.64 | 1.52±0.07 | 0.83±0.03 | 0.68±0.05 | 0.22±0.02 | 0.29±0.05 | 0.30±0.14 | 1.58±0.15 | Prolate | Large | Circular | Striate |
| Cultivated accessions | | | | | | | | | | | | | | | | | |
| EG01 | EG | 38.70±2.96 | 24.33±1.16 | 1.59 | 32.41±2.48 | 8.22±1.55 | 1.88±0.13 | 1.01±0.07 | 0.87±0.07 | 0.24±0.03 | 0.53±0.11 | 0.47±0.09 | 0.79±0.17 | Prolate | Medium | Circular | Striate |
| EG02 | EG | 46.51±2.94 | 30.89±1.47 | 1.51 | 41.12±2.60 | 8.52±1.11 | 1.46±0.06 | 0.80±0.04 | 0.66±0.03 | 0.33±0.04 | 0.53±0.08 | 0.16±0.05 | 0.06±0.03 | Prolate | Medium | Circular | Striate |
| EG03 | EG | 36.42±2.29 | 25.54±1.89 | 1.43 | 32.07±2.02 | 5.27±0.42 | 1.70±0.13 | 0.96±0.08 | 0.74±0.08 | 0.30±0.04 | 0.43±0.06 | 0.57±0.18 | 1.08±0.09 | Prolate | Medium | Circular | Striate |
| EG04 | EG | 40.22±2.57 | 25.08±2.59 | 1.60 | 38.24±2.45 | 7.00±0.35 | 1.45±0.07 | 0.87±0.06 | 0.58±0.03 | 0.33±0.04 | 0.42±0.05 | 0.36±0.16 | 0.36±0.09 | Prolate | Medium | Circular | Striato-reticulate ornamentation |
| EG05 | EG | 55.15±2.92 | 33.13±1.50 | 1.66 | 49.18±2.60 | 9.29±1.23 | 1.41±0.05 | 0.71±0.05 | 0.70±0.04 | 0.32±0.04 | 0.46±0.07 | 0.26±0.06 | 1.11±0.09 | Prolate | Large | Circular | Striate |
| EG06 | EG | 43.67±1.43 | 29.41±2.29 | 1.48 | 40.48±1.33 | 6.42±0.51 | 1.55±0.14 | 0.69±0.14 | 0.86±0.14 | 0.26±0.04 | 0.41±0.11 | 0.57±0.14 | 0.65±0.22 | Prolate | Medium | Circular | Striate |
| EG08 | EG | 46.72±3.05 | 30.70±1.92 | 1.52 | 39.38±2.57 | 7.32±0.58 | 1.04±0.05 | 0.56±0.02 | 0.48±0.04 | 0.33±0.02 | 0.52±0.08 | 0.28±0.04 | 0.30±0.07 | Prolate | Medium | Circular | Striate |
| NCG01 | NCG | 39.31±2.68 | 24.37±2.01 | 1.61 | 33.55±2.29 | 4.57±0.64 | 1.60±0.07 | 0.95±0.07 | 0.65±0.05 | 0.26±0.02 | 0.48±0.07 | 0.28±0.06 | 0.64±0.05 | Prolate | Medium | Circular | Striate |
| NCG02 | NCG | 40.84±3.13 | 21.07±2.98 | 1.94 | 38.86±2.98 | 6.93±1.94 | 1.60±0.07 | 0.95±0.07 | 0.65±0.05 | 0.19±0.02 | 0.30±0.04 | 0.20±0.04 | 0.67±0.09 | Prolate | Medium | Circular | Striate |
| NCG03 | NCG | 47.94±1.89 | 31.26±1.82 | 1.53 | 41.51±1.64 | 4.64±2.20 | 1.65±0.05 | 0.88±0.04 | 0.77±0.07 | 0.25±0.03 | 0.34±0.05 | 0.55±0.13 | 1.22±0.13 | Prolate | Medium | Circular | Striate |
| NCG04 | NCG | 45.74±1.28 | 29.69±2.02 | 1.54 | 43.41±1.21 | 9.43±0.71 | 1.61±0.07 | 0.96±0.06 | 0.65±0.04 | 0.27±0.02 | 0.49±0.06 | 0.17±0.02 | 0.50±0.20 | Prolate | Medium | Circular | Striate |
| NCG05 | NCG | 35.74±3.22 | 25.80±1.82 | 1.39 | 28.89±2.60 | 4.44±0.62 | 1.80±0.09 | 1.06±0.04 | 0.73±0.08 | 0.22±0.02 | 0.37±0.05 | 0.00±0.00 | 0.00±0.00 | Prolate | Medium | Circular | Striate |
| NCG06 | NCG | 38.94±3.25 | 25.07±1.95 | 1.55 | 36.35±3.03 | 4.55±0.43 | 2.23±0.08 | 1.27±0.04 | 0.97±0.07 | 0.31±0.04 | 0.58±0.08 | 0.14±0.02 | 0.38±0.06 | Prolate | Medium | Circular | Striate |
| NCG07 | NCG | 36.78±1.89 | 23.13±1.22 | 1.59 | 31.84±1.64 | 4.64±0.76 | 1.69±0.08 | 1.04±0.06 | 0.65±0.05 | 0.21±0.01 | 0.43±0.05 | 0.21±0.06 | 0.35±0.06 | Prolate | Medium | Circular | Striate |
| NCG09 | NCG | 40.93±2.61 | 30.76±3.20 | 1.33 | 32.76±2.09 | 7.61±1.20 | 1.89±0.11 | 1.09±0.09 | 0.80±0.07 | 0.26±0.03 | 0.46±0.07 | 0.30±0.05 | 0.67±0.14 | Prolate | Medium | Circular | Striate |
| NCG10 | NCG | 32.14±2.74 | 25.95±2.08 | 1.24 | 31.00±2.64 | 7.47±0.97 | 1.69±0.04 | 1.05±0.05 | 0.64±0.03 | 0.22±0.02 | 0.39±0.05 | 0.27±0.05 | 1.19±0.19 | Subprolate | Medium | Circular | Striate |
| NCG12 | NCG | 34.69±2.75 | 20.64±2.12 | 1.68 | 30.37±2.41 | 8.22±1.44 | 1.94±0.09 | 1.08±0.05 | 0.87±0.07 | 0.24±0.03 | 0.42±0.04 | 0.27±0.05 | 0.68±0.21 | Prolate | Medium | Circular | Striate |
| NCG13 | NCG | 48.30±2.21 | 32.63±2.50 | 1.48 | 42.71±1.96 | 7.86±0.40 | 1.60±0.07 | 0.91±0.04 | 0.69±0.05 | 0.21±0.03 | 0.37±0.07 | 0.47±0.10 | 1.73±0.30 | Prolate | Medium | Circular | Striate |
| NCG14 | NCG | 38.53±1.72 | 26.06±1.12 | 1.48 | 35.49±1.58 | 6.98±0.94 | 2.18±0.12 | 1.26±0.07 | 0.92±0.08 | 0.26±0.03 | 0.28±0.05 | 0.18±0.03 | 0.28±0.12 | Prolate | Medium | Circular | Striate |
| NCG16 | NCG | 36.77±2.64 | 20.12±1.96 | 1.83 | 31.96±2.29 | 4.77±0.66 | 1.14±0.07 | 0.71±0.04 | 0.44±0.06 | 0.24±0.01 | 0.33±0.04 | 0.25±0.05 | 0.21±0.05 | Prolate | Medium | Circular | Striate |
| NCG17 | NCG | 48.25±1.61 | 34.90±1.43 | 1.38 | 45.10±1.51 | 7.32±1.11 | 1.39±0.07 | 0.79±0.04 | 0.61±0.06 | 0.36±0.06 | 0.51±0.08 | 0.34±0.09 | 1.16±0.17 | Prolate | Medium | Circular | Striate |
| CAG02 | CAG | 39.87±1.47 | 24.63±1.25 | 1.62 | 35.77±1.31 | 8.23±0.95 | 1.65±0.08 | 0.88±0.05 | 0.77±0.05 | 0.19±0.02 | 0.37±0.06 | 0.32±0.10 | 0.72±0.16 | Prolate | Medium | Circular | Striate |
| CAG03 | CAG | 38.39±2.83 | 24.83±1.73 | 1.55 | 33.14±2.44 | 11.33±0.89 | 1.57±0.05 | 0.82±0.03 | 0.75±0.05 | 0.24±0.04 | 0.52±0.07 | 0.27±0.05 | 0.35±0.07 | Prolate | Medium | Circular | Striate |
| CAG04 | CAG | 36.28±1.89 | 25.28±1.09 | 1.44 | 32.94±1.71 | 6.22±0.93 | 1.86±0.07 | 1.10±0.04 | 0.77±0.05 | 0.23±0.02 | 0.33±0.04 | 0.25±0.09 | 0.10±0.04 | Prolate | Medium | Circular | Striate |
| CAG05 | CAG | 37.68±1.21 | 21.52±1.35 | 1.75 | 31.36±1.01 | 7.24±0.97 | 1.44±0.04 | 0.86±0.05 | 0.57±0.04 | 0.24±0.02 | 0.43±0.08 | 0.24±0.07 | 0.74±0.16 | Prolate | Medium | Circular | Striate |
| CAG06 | CAG | 44.21±2.32 | 30.51±1.72 | 1.45 | 38.72±2.03 | 7.96±1.08 | 1.66±0.09 | 0.96±0.05 | 0.71±0.08 | 0.27±0.03 | 0.49±0.06 | 0.25±0.04 | 0.42±0.04 | Prolate | Medium | Circular | Striate |
| CAG08 | CAG | 37.26±2.32 | 23.15±2.24 | 1.61 | 32.80±2.04 | 14.04±1.33 | 1.41±0.06 | 0.94±0.07 | 0.47±0.05 | 0.23±0.02 | 0.31±0.07 | 0.36±0.08 | 0.34±0.07 | Prolate | Medium | Circular | Striate |
| CAG09 | CAG | 41.54±1.53 | 27.77±1.52 | 1.50 | 39.58±1.46 | 7.59±0.80 | 1.67±0.13 | 0.92±0.05 | 0.74±0.10 | 0.20±0.02 | 0.42±0.05 | 0.55±0.09 | 0.91±0.14 | Prolate | Medium | Circular | Striate |
| CAG10 | CAG | 40.33±3.10 | 27.06±2.79 | 1.49 | 35.73±2.75 | 8.86±0.79 | 2.31±0.10 | 1.30±0.08 | 1.00±0.07 | 0.24±0.01 | 0.32±0.05 | 0.17±0.05 | 0.57±0.15 | Prolate | Medium | Circular | Striate |
| CAG12 | CAG | 39.78±1.52 | 22.48±1.62 | 1.77 | 35.50±1.36 | 11.07±1.69 | 1.69±0.08 | 0.99±0.05 | 0.71±0.05 | 0.33±0.04 | 0.40±0.10 | 0.28±0.05 | 0.52±0.06 | Prolate | Medium | Circular | Striate |
| CAG15 | CAG | 37.67±3.65 | 22.84±2.34 | 1.65 | 36.81±3.56 | 6.06±0.41 | 1.66±0.08 | 0.84±0.03 | 0.82±0.06 | 0.31±0.03 | 0.38±0.05 | 0.18±0.03 | 0.35±0.08 | Prolate | Medium | Circular | Striate |
| CAG16 | CAG | 37.45±2.06 | 22.38±1.80 | 1.67 | 34.65±1.91 | 9.19±0.70 | 1.87±0.12 | 1.09±0.06 | 0.78±0.09 | 0.22±0.02 | 0.27±0.03 | 0.00±0.00 | 0.00±0.02 | Prolate | Medium | Circular | Striate |
| CAG18 | CAG | 38.66±1.54 | 28.38±1.23 | 1.36 | 36.24±1.44 | 7.09±0.71 | 1.51±0.10 | 0.78±0.08 | 0.73±0.06 | 0.27±0.03 | 0.34±0.05 | 0.54±0.09 | 0.65±0.10 | Prolate | Medium | Circular | Striate |
| CAG19 | CAG | 35.23±1.92 | 23.13±2.20 | 1.52 | 31.20±1.70 | 6.49±1.20 | 1.56±0.06 | 0.91±0.05 | 0.65±0.03 | 0.26±0.02 | 0.38±0.05 | 0.21±0.05 | 0.11±0.06 | Prolate | Medium | Circular | Striate |
| CAG21 | CAG | 34.08±2.18 | 25.37±1.40 | 1.34 | 30.18±1.93 | 6.98±1.20 | 1.87±0.10 | 0.97±0.08 | 0.90±0.09 | 0.20±0.03 | 0.39±0.04 | 0.39±0.06 | 1.01±0.11 | Prolate | Medium | Circular | Striate |
| CAG23 | CAG | 37.21±2.20 | 23.35±1.69 | 1.59 | 32.90±1.94 | 9.55±1.16 | 1.56±0.07 | 0.84±0.04 | 0.72±0.06 | 0.25±0.02 | 0.31±0.06 | 0.30±0.04 | 0.23±0.08 | Prolate | Medium | Circular | Striate |
| CAG24 | CAG | 39.88±1.61 | 24.43±1.19 | 1.63 | 36.14±1.46 | 5.95±0.39 | 1.35±0.11 | 0.79±0.04 | 0.56±0.09 | 0.28±0.04 | 0.38±0.06 | 0.32±0.06 | 1.60±0.17 | Prolate | Medium | Circular | Striate |
| CAG25 | CAG | 38.29±1.83 | 24.29±1.01 | 1.58 | 31.24±1.50 | 11.63±1.10 | 2.04±0.08 | 1.17±0.05 | 0.87±0.04 | 0.30±0.03 | 0.37±0.03 | 0.31±0.11 | 0.38±0.09 | Prolate | Medium | Circular | Striate |
| CAG26 | CAG | 39.14±2.82 | 27.69±2.09 | 1.41 | 32.49±2.35 | 7.47±0.74 | 1.38±0.06 | 0.78±0.04 | 0.60±0.04 | 0.27±0.03 | 0.52±0.07 | 0.39±0.10 | 0.96±0.05 | Prolate | Medium | Circular | Striate |
| CAG27 | CAG | 46.65±3.21 | 27.38±2.92 | 1.70 | 39.77±2.74 | 9.64±0.75 | 1.81±0.04 | 1.02±0.07 | 0.79±0.05 | 0.32±0.03 | 0.53±0.04 | 0.34±0.05 | 0.97±0.16 | Prolate | Medium | Circular | Striate |
| CAG30 | CAG | 37.09±2.06 | 25.17±1.46 | 1.47 | 33.74±1.87 | 8.74±0.99 | 2.19±0.09 | 1.36±0.07 | 0.83±0.07 | 0.26±0.04 | 0.51±0.05 | 0.25±0.05 | 0.93±0.18 | Prolate | Medium | Circular | Striate |
| CAG33 | CAG | 34.94±4.12 | 20.98±3.20 | 1.67 | 30.67±3.62 | 8.38±1.05 | 1.39±0.08 | 0.78±0.04 | 0.61±0.04 | 0.32±0.03 | 0.41±0.07 | 0.23±0.06 | 0.63±0.13 | Prolate | Medium | Circular | Striate |
| CAG34 | CAG | 36.65±2.05 | 24.14±0.97 | 1.52 | 32.20±1.80 | 8.38±0.75 | 2.04±0.15 | 1.25±0.09 | 0.79±0.09 | 0.26±0.02 | 0.44±0.05 | 0.27±0.03 | 0.13±0.08 | Prolate | Medium | Circular | Striate |
| CAG35 | CAG | 51.86±4.35 | 34.37±3.41 | 1.51 | 47.50±3.98 | 8.25±1.21 | 1.65±0.08 | 1.05±0.06 | 0.60±0.04 | 0.23±0.02 | 0.28±0.05 | 0.20±0.05 | 0.07±0.02 | Prolate | Large | Circular | Striate |
| CAG36 | CAG | 35.80±2.71 | 22.29±1.73 | 1.61 | 29.96±2.27 | 9.70±1.62 | 1.48±0.08 | 0.81±0.05 | 0.68±0.07 | 0.19±0.02 | 0.37±0.03 | 0.36±0.06 | 0.24±0.13 | Prolate | Medium | Circular | Striate |
| CAG37 | CAG | 38.17±1.59 | 21.28±1.81 | 1.79 | 34.25±1.42 | 6.38±0.90 | 1.98±0.08 | 1.07±0.07 | 0.91±0.09 | 0.25±0.02 | 0.38±0.05 | 0.20±0.03 | 0.04±0.08 | Prolate | Medium | Circular | Striate |
| CAG38 | CAG | 42.41±2.71 | 27.31±2.69 | 1.55 | 36.68±2.35 | 5.62±1.29 | 1.45±0.06 | 0.87±0.05 | 0.58±0.02 | 0.24±0.02 | 0.28±0.06 | 0.27±0.07 | 1.27±0.14 | Prolate | Medium | Circular | Striate |
| CAG40 | CAG | 46.07±3.42 | 29.97±2.00 | 1.54 | 40.73±3.03 | 14.44±1.48 | 1.78±0.06 | 1.04±0.04 | 0.74±0.04 | 0.23±0.02 | 0.43±0.04 | 0.23±0.07 | 0.75±0.15 | Prolate | Medium | Circular | Striate |
| CAG41 | CAG | 37.47±1.28 | 21.58±1.52 | 1.74 | 32.01±1.09 | 15.44±1.26 | 1.63±0.07 | 0.93±0.08 | 0.70±0.05 | 0.26±0.04 | 0.41±0.07 | 0.29±0.18 | 0.46±0.13 | Prolate | Medium | Circular | Striate |
| CAG44 | CAG | 34.24±1.78 | 23.80±1.50 | 1.44 | 29.64±1.54 | 6.91±0.69 | 1.56±0.04 | 0.92±0.04 | 0.64±0.03 | 0.22±0.01 | 0.28±0.05 | 0.26±0.05 | 0.14±0.03 | Prolate | Medium | Circular | Striate |
| CAG52 | CAG | 38.68±2.70 | 25.22±2.26 | 1.53 | 34.88±2.44 | 7.66±0.78 | 1.64±0.05 | 1.02±0.05 | 0.62±0.02 | 0.27±0.03 | 0.33±0.08 | 0.40±0.06 | 1.91±0.17 | Prolate | Medium | Circular | Striate |
| CAG54 | CAG | 40.88±1.82 | 31.03±1.74 | 1.32 | 36.90±1.65 | 5.33±0.81 | 2.08±0.07 | 1.19±0.05 | 0.90±0.06 | 0.28±0.02 | 0.37±0.05 | 0.23±0.04 | 0.18±0.10 | Subprolate | Medium | Circular | Striate |
| CAG55 | CAG | 41.59±1.68 | 23.54±1.31 | 1.77 | 38.17±1.54 | 10.82±2.32 | 1.85±0.11 | 1.08±0.08 | 0.78±0.05 | 0.25±0.05 | 0.34±0.05 | 0.36±0.05 | 0.41±0.15 | Prolate | Medium | Circular | Striate |
| CAG56 | CAG | 49.71±2.28 | 36.38±1.80 | 1.37 | 44.77±2.06 | 17.80±1.65 | 1.73±0.09 | 1.01±0.04 | 0.73±0.08 | 0.22±0.02 | 0.42±0.03 | 0.22±0.05 | 0.24±0.06 | Prolate | Medium | Circular | Striate |
| CAG58 | CAG | 39.98±2.89 | 27.11±2.09 | 1.47 | 34.50±2.49 | 10.94±0.79 | 1.80±0.08 | 1.07±0.04 | 0.73±0.06 | 0.21±0.23 | 0.37±0.04 | 0.30±0.03 | 0.73±0.13 | Prolate | Medium | Circular | Striate |
| CAG59 | CAG | 40.73±2.03 | 22.79±2.05 | 1.79 | 33.67±1.68 | 7.50±0.77 | 1.44±0.07 | 0.89±0.04 | 0.55±0.05 | 0.25±0.01 | 0.37±0.05 | 0.24±0.04 | 0.60±0.11 | Prolate | Medium | Circular | Striate |
| CAG60 | CAG | 35.76±3.29 | 26.81±2.70 | 1.33 | 30.98±2.85 | 7.92±0.94 | 1.37±0.06 | 0.83±0.03 | 0.54±0.06 | 0.27±0.03 | 0.30±0.06 | 0.26±0.08 | 0.86±0.16 | Prolate | Medium | Circular | Striate |
| CAG61 | CAG | 39.27±3.23 | 21.64±2.76 | 1.81 | 32.05±2.64 | 7.38±0.29 | 1.56±0.08 | 0.89±0.05 | 0.67±0.07 | 0.31±0.03 | 0.44±0.06 | 0.50±0.09 | 0.51±0.09 | Prolate | Medium | Circular | Striate |
| CAG63 | CAG | 41.12±2.98 | 26.62±2.87 | 1.54 | 36.38±2.64 | 7.57±0.80 | 1.74±0.05 | 0.96±0.06 | 0.78±0.04 | 0.22±0.01 | 0.36±0.06 | 0.28±0.08 | 0.86±0.27 | Prolate | Medium | Circular | Striate |
| CAG64 | CAG | 37.29±1.26 | 22.38±1.69 | 1.67 | 31.80±1.08 | 6.65±0.62 | 1.87±0.11 | 0.99±0.05 | 0.88±0.09 | 0.26±0.02 | 0.42±0.07 | 0.17±0.04 | 0.00±0.03 | Prolate | Medium | Circular | Striate |
| CAG65 | CAG | 42.57±3.70 | 33.60±2.79 | 1.27 | 38.31±3.33 | 15.66±0.94 | 1.55±0.06 | 0.93±0.05 | 0.62±0.07 | 0.37±0.05 | 0.53±0.06 | 0.30±0.07 | 0.65±0.10 | Subprolate | Medium | Circular | Striate |
| CAG66 | CAG | 39.45±1.27 | 25.43±1.13 | 1.55 | 36.06±1.16 | 7.05±0.96 | 1.59±0.08 | 0.99±0.04 | 0.60±0.05 | 0.24±0.05 | 0.40±0.08 | 0.50±0.08 | 0.93±0.17 | Prolate | Medium | Circular | Striate |
| CAG68 | CAG | 40.04±1.47 | 24.29±0.77 | 1.65 | 34.98±1.28 | 6.67±0.63 | 1.96±0.07 | 1.24±0.05 | 0.72±0.05 | 0.27±0.03 | 0.43±0.05 | 0.19±0.03 | 0.51±0.11 | Prolate | Medium | Circular | Striate |
| CAG69 | CAG | 37.97±2.06 | 23.57±0.75 | 1.61 | 34.95±1.89 | 11.02±1.58 | 1.86±0.07 | 1.06±0.05 | 0.79±0.03 | 0.18±0.02 | 0.25±0.04 | 0.19±0.04 | 0.06±0.07 | Prolate | Medium | Circular | Striate |
| CAG70 | CAG | 38.04±3.06 | 23.58±2.32 | 1.61 | 29.28±2.35 | 8.78±0.98 | 1.63±0.24 | 0.95±0.04 | 0.68±0.21 | 0.30±0.02 | 0.44±0.04 | 0.31±0.05 | 0.58±0.08 | Prolate | Medium | Circular | Striate |
| CAG72 | CAG | 37.04±2.54 | 20.54±2.24 | 1.80 | 33.21±2.28 | 8.23±0.84 | 1.43±0.05 | 0.79±0.02 | 0.64±0.05 | 0.22±0.01 | 0.23±0.05 | 0.20±0.04 | 0.86±0.12 | Prolate | Medium | Circular | Striate |
| CAG73 | CAG | 43.42±4.03 | 27.93±2.81 | 1.55 | 38.86±3.61 | 7.29±0.85 | 1.92±0.08 | 1.11±0.05 | 0.82±0.08 | 0.24±0.02 | 0.30±0.07 | 0.30±0.11 | 0.71±0.14 | Prolate | Medium | Circular | Striate |
| CAG74 | CAG | 39.76±2.67 | 23.75±2.76 | 1.67 | 37.02±2.49 | 5.87±1.53 | 1.46±0.04 | 0.87±0.03 | 0.59±0.03 | 0.34±0.05 | 0.38±0.04 | 0.32±0.08 | 0.16±0.11 | Prolate | Medium | Circular | Striate |
| CAG75 | CAG | 40.58±1.58 | 27.35±1.32 | 1.48 | 35.13±1.37 | 8.09±0.76 | 1.81±0.16 | 1.01±0.10 | 0.80±0.07 | 0.25±0.02 | 0.35±0.06 | 0.28±0.05 | 0.02±0.04 | Prolate | Medium | Circular | Striate |
| CAG76 | CAG | 45.47±3.83 | 30.88±3.06 | 1.47 | 40.63±3.42 | 5.91±0.74 | 1.72±0.06 | 0.97±0.03 | 0.75±0.04 | 0.25±0.02 | 0.43±0.06 | 0.40±0.08 | 1.47±0.10 | Prolate | Medium | Circular | Striate |
| CAG77 | CAG | 42.91±4.12 | 33.00±2.62 | 1.30 | 38.56±3.70 | 13.30±2.08 | 1.43±0.07 | 0.87±0.04 | 0.56±0.05 | 0.32±0.02 | 0.42±0.06 | 0.44±0.12 | 0.21±0.25 | Subprolate | Medium | Circular | Striate |
| CAG78 | CAG | 35.31±3.30 | 22.99±2.75 | 1.54 | 31.22±2.92 | 7.92±0.80 | 1.42±0.05 | 0.82±0.04 | 0.60±0.03 | 0.21±0.01 | 0.40±0.05 | 0.23±0.04 | 0.61±0.16 | Prolate | Medium | Circular | Striate |
| CAG79 | CAG | 52.44±2.14 | 39.47±2.00 | 1.33 | 47.41±1.94 | 12.49±1.78 | 1.26±0.04 | 0.81±0.05 | 0.46±0.04 | 0.24±0.01 | 0.43±0.05 | 0.30±0.12 | 0.72±0.14 | Subprolate | Large | Circular | Striate |
| CAG80 | CAG | 49.28±3.52 | 36.34±3.52 | 1.36 | 42.45±3.04 | 10.25±0.80 | 1.59±0.06 | 0.89±0.03 | 0.70±0.05 | 0.29±0.04 | 0.35±0.05 | 0.53±0.07 | 0.52±0.12 | Prolate | Medium | Circular | Striate |
| CAG81 | CAG | 47.71±1.72 | 29.91±1.62 | 1.60 | 45.41±1.64 | 10.05±0.81 | 1.83±0.12 | 0.90±0.03 | 0.93±0.10 | 0.20±0.08 | 0.50±0.11 | 0.46±0.09 | 0.44±0.07 | Prolate | Medium | Circular | Striato-reticulate ornamentation |
| CAG82 | CAG | 43.85±3.88 | 25.29±2.88 | 1.73 | 36.61±3.24 | 8.35±0.89 | 1.75±0.09 | 0.97±0.06 | 0.78±0.05 | 0.26±0.02 | 0.28±0.06 | 0.15±0.10 | 0.22±0.02 | Prolate | Medium | Circular | Striate |
| CAG83 | CAG | 36.00±3.12 | 23.52±2.30 | 1.53 | 31.25±2.71 | 7.68±0.78 | 1.85±0.06 | 1.25±0.05 | 0.60±0.04 | 0.24±0.01 | 0.29±0.03 | 0.41±0.08 | 0.92±0.16 | Prolate | Medium | Circular | Striate |
| ECG02 | SAEG | 42.73±2.06 | 27.44±1.18 | 1.56 | 38.36±1.85 | 9.54±1.31 | 1.60±0.10 | 1.00±0.06 | 0.60±0.07 | 0.43±0.04 | 0.69±0.09 | 0.51±0.09 | 1.02±0.11 | Prolate | Medium | Circular | Striate |
| ECG03 | SAEG | 47.40±3.51 | 33.51±3.31 | 1.41 | 44.55±3.30 | 9.78±1.22 | 1.92±0.09 | 1.09±0.04 | 0.83±0.07 | 0.22±0.02 | 0.47±0.06 | 0.26±0.07 | 0.91±0.19 | Prolate | Medium | Circular | Striate |
| ECG04 | SAEG | 42.83±3.39 | 28.08±2.66 | 1.53 | 39.32±3.11 | 6.17±0.68 | 1.52±0.04 | 0.93±0.03 | 0.60±0.03 | 0.25±0.01 | 0.46±0.05 | 0.28±0.10 | 1.11±0.13 | Prolate | Medium | Circular | Striate |
